# Supplementary material
Source: publisher figshare collection journal article supplement (https://f1000.figshare.com/ndownloader/files/1231318)
Supplement: Supplementary file 1 [file 1231318]

shudaprsd	key_press	instructions	fixation	letter_onscreen	stimulus_interval	RT	Hits	CRs	FAs	Misses	or	oh	HR	FAR	Z_HR	Z_FAR	d
0	6	920.784	923.684	925.217	925.75	0.342	34	211	28	26	1	0	0.56667	0.11667	0.16789	-1.1918	1.3597
0	6			927.283	927.817	0.444
0	6			929.35	929.883	0.92
0	6			931.415	931.948	0.53
0	6			933.482	934.015	0.555
1	6			935.548	936.081	0.874
0	6			937.614	938.148	0.865
0	6			939.68	940.213	0.586
0	6			941.746	942.279	0.623
0	6			943.813	944.346	1.24
0	6			945.879	946.412	0.762
0	6			947.944	948.478	1.076
0	6			950.011	950.544	0.808
0	6			952.077	952.611	0.816
0	6			954.144	954.677	1.133
1	8			956.21	956.743	0.966
0	8			958.276	958.809	1.015
0	6			960.342	960.875	0.566
0	6			962.408	962.942	0.78
1	6			964.475	965.008	1.355
0	6			966.54	967.073	1.288
0	6			968.607	969.14	0.891
0	6			970.673	971.206	1.134
0	6			972.739	973.273	0.849
0	6			974.805	975.338	0.928
1	8			976.871	977.404	0.555
0	6			978.938	979.471	0.65
0	6			981.004	981.537	1.338
0	6			983.07	983.604	1.37
0	6			985.136	985.669	1.718
0	6			987.202	987.736	1.814
1	8			989.269	989.802	1.065
0	6			991.335	991.868	0.892
1	6			993.401	993.934	0.818
0	6			995.467	996	1.078
0	8			997.533	998.067	0.559
0	6			999.6	1000.133	0.584
0	6			1001.665	1002.198	0.693
0	6			1003.732	1004.265	0.712
0	6			1005.798	1006.331	0.772
0	6			1007.864	1008.398	1.337
1	6			1009.931	1010.464	1.286
0	6			1011.996	1012.529	1.371
0	6			1014.063	1014.596	1.771
0	8			1016.129	1016.662	1.68
0	6			1018.195	1018.729	1.12
0	8			1020.261	1020.794	1.321
0	6			1022.327	1022.861	0.609
0	6			1024.394	1024.927	0.849
0	6			1026.46	1026.993	1.234
1	6			1028.526	1029.059	1.428
1	8			1030.592	1031.125	1.818
0	6			1032.658	1033.192	1.1
0	6			1034.725	1035.258	1.335
0	6			1036.791	1037.324	1.18
0	6			1038.857	1039.39	1.317
0	8			1040.923	1041.456	0.616
0	6			1042.989	1043.523	1.421
0	6			1045.056	1045.589	1.177
0	6			1047.121	1047.654	0.981
0	6			1049.188	1049.721	0.783
1	8			1051.254	1051.787	1.107
0	6			1053.32	1053.854	0.629
0	6			1055.386	1055.919	0.854
1	8			1057.452	1057.986	1.572
0	6			1059.519	1060.052	0.987
0	8			1061.585	1062.118	1.194
0	6			1063.652	1064.184	0.768
1	6			1065.717	1066.25	1.082
0	6			1067.783	1068.317	1.149
0	6			1069.85	1070.383	0.816
0	8			1071.916	1072.449	0.871
1	6			1073.982	1074.515	0.844
1	6			1076.048	1076.581	0.794
0	6			1078.114	1078.648	0.744
1	8			1080.181	1080.714	0.845
0	6			1082.246	1082.779	1.258
0	6			1084.313	1084.846	1.142
0	6			1086.379	1086.912	1.221
1	8			1088.445	1088.979	1.475
0	6			1090.512	1091.044	1.183
0	8			1092.577	1093.111	1.445
1	6			1094.644	1095.177	1.053
1	6			1096.71	1097.243	0.821
0	6			1098.777	1099.31	0.805
0	6			1100.842	1101.375	0.967
0	6			1102.908	1103.442	1.016
0	6			1104.975	1105.508	0.918
0	6			1107.041	1107.574	0.844
0	6			1109.107	1109.64	1.128
0	6			1111.173	1111.706	0.837
0	8			1113.239	1113.773	0.447
0	6			1115.306	1115.839	0.641
0	6			1117.372	1117.904	0.544
0	6			1119.438	1119.971	1.121
0	6			1121.504	1122.037	1.211
1	8			1123.57	1124.104	1.055
0	6			1125.637	1126.17	0.494
0	8			1127.702	1128.236	1.148
0	6			1129.769	1130.302	1.008
0	6			1131.835	1132.368	1.298
0	8			1133.902	1134.435	1.668
0	6			1135.967	1136.5	1.021
0	6			1138.033	1138.567	1.088
0	6			1140.1	1140.633	1.107
0	6			1142.166	1142.699	1.004
0	6			1144.232	1144.765	0.965
0	6			1146.298	1146.831	1.032
1	6			1148.364	1148.898	0.964
1	6			1150.431	1150.964	0.983
0	6			1152.497	1153.03	1.454
0	6			1154.563	1155.096	1.129
0	8			1156.629	1157.162	1.178
0	6			1158.695	1159.229	1.168
1	8			1160.762	1161.295	0.824
1	8			1162.827	1163.361	1.484
0	6			1164.894	1165.427	0.841
0	6			1166.96	1167.493	0.901
0	8			1169.027	1169.56	0.991
0	6			1171.092	1171.625	1.053
0	6			1173.158	1173.692	0.914
0	6			1175.225	1175.758	1.109
0	6			1177.291	1177.824	0.959
0	6			1179.358	1179.891	0.943
0	6			1181.423	1181.956	0.987
0	6			1183.489	1184.023	1.757
0	6			1185.556	1186.089	0.856
0	6			1187.622	1188.155	0.917
0	6			1189.688	1190.221	1.295
0	6			1191.754	1192.287	0.951
0	6			1193.82	1194.354	1.182
1	8			1195.887	1196.42	1.324
0	6			1197.952	1198.486	0.806
1	8			1200.019	1200.552	0.895
1	6			1202.085	1202.618	0.763
0	6			1204.152	1204.685	0.7
1	6			1206.218	1206.751	1.347
1	8			1208.283	1208.817	1.18
1	8			1210.35	1210.883	0.918
0	6			1212.416	1212.949	0.645
0	6			1214.483	1215.016	1.373
0	6			1216.548	1217.081	0.942
0	8			1218.614	1219.148	1.771
0	6			1220.681	1221.214	1.239
0	6			1222.747	1223.28	1.072
0	6			1224.813	1225.346	1.179
0	6			1226.879	1227.412	0.936
0	6			1228.945	1229.479	1.875
0	0			1231.012	1231.545	0
0	6			1233.077	1233.611	0.427
0	6			1235.144	1235.677	1.278
1	6			1237.21	1237.743	0.8
0	6			1239.277	1239.81	0.795
0	6			1241.343	1241.876	0.991
0	6			1243.408	1243.942	0.754
1	8			1245.475	1246.008	0.586
1	8			1247.541	1248.074	1.467
0	6			1249.608	1250.141	1.041
0	6			1251.673	1252.206	1.026
0	6			1253.739	1254.273	1.281
0	6			1255.806	1256.339	0.983
0	8			1257.872	1258.405	0.991
0	6			1259.938	1260.471	0.859
0	6			1262.004	1262.537	0.797
0	6			1264.07	1264.604	0.682
1	8			1266.137	1266.67	0.373
1	8			1268.203	1268.736	0.375
0	6			1270.269	1270.802	0.577
1	8			1272.335	1272.868	0.609
1	8			1274.402	1274.935	0.452
0	6			1276.468	1277.001	0.442
0	8			1278.533	1279.067	0.539
0	6			1280.6	1281.133	0.558
0	6			1282.666	1283.199	1.053
0	6			1284.733	1285.266	1.207
0	6			1286.798	1287.331	1.427
1	6			1288.864	1289.398	1.335
0	6			1290.931	1291.464	1.348
0	6			1292.997	1293.53	1.275
1	6			1295.064	1295.597	1.229
0	6			1297.129	1297.662	1.209
0	6			1299.195	1299.729	0.737
0	6			1301.262	1301.795	0.685
0	6			1303.328	1303.861	0.963
0	8			1305.394	1305.927	0.901
0	6			1307.46	1307.993	1.021
0	6			1309.527	1310.06	0.946
0	6			1311.593	1312.126	0.808
0	6			1313.658	1314.192	0.817
0	6			1315.725	1316.258	0.736
1	8			1317.791	1318.324	0.504
0	6			1319.858	1320.391	0.628
0	6			1321.924	1322.457	0.736
0	6			1323.989	1324.523	0.71
0	8			1326.056	1326.589	0.753
0	6			1328.122	1328.655	0.726
1	6			1330.189	1330.722	0.885
0	6			1332.254	1332.787	0.555
1	8			1334.32	1334.854	0.604
0	6			1336.387	1336.92	0.705
0	6			1338.453	1338.986	0.813
1	8			1340.519	1341.052	0.891
0	6			1342.585	1343.118	0.823
1	6			1344.652	1345.185	0.702
0	6			1346.718	1347.251	0.64
0	6			1348.784	1349.318	0.583
0	6			1350.85	1351.383	0.861
0	8			1352.916	1353.449	1.01
0	6			1354.983	1355.516	0.871
0	8			1357.049	1357.582	1.061
0	6			1359.114	1359.648	0.935
0	6			1361.181	1361.714	0.737
0	8			1363.247	1363.78	0.54
0	6			1365.314	1365.847	0.53
0	6			1367.379	1367.912	0.463
0	6			1369.445	1369.979	0.776
0	6			1371.512	1372.045	0.689
1	6			1373.578	1374.111	0.879
0	6			1375.644	1376.177	0.934
0	6			1377.71	1378.243	0.86
0	6			1379.777	1380.31	0.833
0	6			1381.843	1382.376	0.929
0	8			1383.909	1384.443	0.685
0	6			1385.975	1386.508	0.564
0	6			1388.041	1388.574	0.479
0	6			1390.108	1390.641	1.002
0	6			1392.174	1392.707	0.945
0	6			1394.239	1394.773	0.703
0	6			1396.306	1396.839	1.079
0	6			1398.372	1398.905	0.618
0	6			1400.439	1400.972	0.954
1	6			1402.504	1403.037	0.91
0	6			1404.57	1405.104	0.719
0	6			1406.637	1407.17	0.598
0	6			1408.703	1409.236	0.869
0	8			1410.77	1411.303	0.396
0	6			1412.835	1413.368	0.833
0	6			1414.902	1415.435	0.987
1	6			1416.968	1417.501	0.884
0	6			1419.034	1419.568	1.05
1	8			1421.1	1421.633	1.041
0	8			1423.166	1423.699	0.598
0	6			1425.233	1425.766	0.722
0	6			1427.299	1427.832	0.619
0	6			1429.364	1429.898	0.775
1	8			1431.431	1431.964	0.419
0	6			1433.497	1434.03	0.532
0	8			1435.564	1436.097	0.633
0	6			1437.63	1438.163	0.565
0	6			1439.695	1440.229	0.68
0	6			1441.762	1442.295	0.723
0	6			1443.828	1444.361	0.971
1	8			1445.895	1446.428	0.662
0	6			1447.96	1448.493	0.677
1	8			1450.027	1450.56	0.877
0	6			1452.093	1452.626	0.645
0	6			1454.159	1454.693	0.671
1	8			1456.225	1456.758	0.375
0	6			1458.291	1458.824	0.658
0	6			1460.358	1460.891	0.607
0	6			1462.424	1462.957	0.791
0	6			1464.49	1465.024	0.846
0	8			1466.556	1467.089	0.872
0	6			1468.622	1469.155	0.827
0	6			1470.689	1471.222	0.799
0	6			1472.755	1473.288	0.714
0	6			1474.82	1475.354	0.477
0	6			1476.887	1477.42	0.906
0	6			1478.953	1479.486	0.774
0	6			1481.02	1481.553	0.757
0	6			1483.085	1483.618	0.491
1	6			1485.152	1485.685	0.61
0	6			1487.218	1487.751	0.542
1	6			1489.284	1489.818	0.427
0	6			1491.35	1491.883	0.787
1	6			1493.416	1493.949	0.731
0	6			1495.483	1496.016	1.013
0	6			1497.549	1498.082	0.781
0	6			1499.615	1500.149	1.575
0	6			1501.681	1502.214	0.886
0	8			1503.747	1504.28	1.755
0	6			1505.814	1506.347	0.713
0	6			1507.88	1508.413	0.962
0	6			1509.945	1510.479	0.725
0	6			1512.012	1512.545	0.644
0	8			1514.078	1514.611	0.576
0	6			1516.145	1516.678	0.607
1	6			1518.21	1518.743	0.599
0	6			1520.277	1520.81	0.606
0	6			1522.343	1522.876	0.708
1	8			1524.409	1524.943	0.523
1	8			1526.476	1527.009	0.354
1	8			1528.541	1529.074	0.826
1	8			1530.608	1531.141	0.91
0	6			1532.674	1533.207	0.49
1	8			1534.74	1535.274	1.002
0	6			1536.806	1537.339	0.677
0	6			1538.872	1539.405	0.614
0	6			1540.939	1541.472	0.645
0	6			1543.005	1543.538	0.958
